# Supplementary material for: Cytomegalovirus congenital infection: long-term outcomes in a valaciclovir treated population
Source: publisher site journal article supplement (doi:10.1515/jpm-2023-0535), 2024-06-29
Supplement: Supplementary file 1 [file j_jpm-2023-0535_suppl_001.docx]

**Supplementary Information**

| ID | Trimestre of Infection | Start of therapy (weeks) | Duration (weeks) | Classification | Other findings | Neurossonography | MRI | Symptomatic at brith | Sequelae | Classification |
| --- | --- | --- | --- | --- | --- | --- | --- | --- | --- | --- |
| 1 | ND | 33 | 5 | Major |  | Periventricular hypechogenicity. Hemorraghe in the striatum (candle stick). Vermis dysmorphia | Moderately dilated ventricular atria, hyperintense signal on T2 extending into the temporal region, where focal areas of increased signal intensity are also present. Symmetric small germinolytic cysts. | Yes | Severe language delay without hearing deficits | Cerebral |
| 2 | ND | 25 | 13 | Major |  | Periventricular hyperechogenicity and germinal matrix hyperecogenicity. | No findings | No | Severe right hearing loss and left hypoacusia + Development delay + Behavioral disturbance | Multiple |
| 3 | 1 | 24 | 14 | Major |  | Bilateral periventricular hyperechogenicity, with right intra-ventricular adhesions | Loss of contour along the ventricular wall at the level of the atrium and its occipital horn. | Yes | Bilateral hearing loss + Cerebral Palsy | Multiple |
| 4 | 1 | 23 | 17 | 0 |  | No findings | No findings | Yes | Severe left hearing loss with language delay assumed in this context | SNHL |
| 5 | 1 | 26 | 13 | 0 |  | No findings | No findings | No | Left hearing loss with language delay assumed in this context | SNHL |
| 6 | 1 | 24 | 14 | 0 |  | No findings | No findings | Yes | Severe bilateral hearing loss with implants. Development delay assumed in this context | SNHL |
| 7 | 1 | 22 | 16 | 0 |  | No findings | No findings | No | Bilateral hearing loss | SNHL |
| 8 | 1 | 22 | 14 | Extra | Placentomegaly, hyperechogenic bowel, mild pericardial effusion | No findings | No findings | Yes | Bilateral hearing loss | SNHL |
| 9 | ND | 29 | 11 | Major |  | Bilateral periventricular hyperechogenecity, with germinal matrix irregularties. | No findings | No | Unilateral hearing loss | SNHL |
| 10 | 1 | 28 | 10 | Minor |  | No findings | No findings | No | Bilateral hearing loss | SNHL |
| 11 | ND | 27 | 11 | Minor |  | Subependymal cysts | Focal pathologic dilations in the occipital horns | Yes | Unilateral retinopathy | Visual |
| 12 | ND | 32 | 6 | 0 |  | No findings | No findings | No | Normal | |
| 13 | 1 | 24 | 14 | 0 |  | No findings | No findings | No | Normal | |
| 14 | 2 | 33 | 5 | 0 |  | No findings | No findings | No | Normal | |
| 15 | 1 | 22 | 14 | 0 |  | No findings | Not done | No | Normal | |
| 16 | 1 | 22 | 14 | 0 |  | No findings | Not done | No | Normal | |
| 17 | 1 | 24 | 15 | 0 |  | No findings | No findings | No | Normal | |
| 18 | 2 | 30 | 6 | 0 |  | No findings | No findings | No | Normal | |
| 19 | 1 | 23 | 16 | 0 |  | No findings | No findings | No | Normal | |
| 20 | 2 | 33 | 5 | 0 |  | No findings | Not done | No | Normal | |
| 21 | 1 | 25 | 14 | 0 |  | No findings | Increase in amplitude of the sulcus-cisternal spaces | No | Normal | |
| 22 | 1 | 31 | 8 | Extra | Hyperechogenic bowel | No findings | No findings | No | Normal | |
| 23 | 2 | 32 | 6 | Extra | Difuse hepatic calcifications | No findings | No findings | No | Normal | |
| 24 | ND | 31 | 5 | Extra | Early intrauterine growth restriction, PS-ACM>1.5MoM | No findings | No findings | No | Normal | |
| 25 | ND | 24 | 10 | Extra | Intrauterine growth restriction with mildly hyperechogenic bowel | No findings | No findings | No | Normal | |
| 26 | 1 | 17 | 21 | Minor |  | No findings | Bilateral mesial anterior temporal cysts. | No | Normal | |
| 27 | 1 | 23 | 15 | Minor |  | No findings | Intraventricular cysts in the frontal horns, dilation and dysmorphism of the temporal horns. Signal alteration in the parieto-occipital white matter. | Yes | Normal | |
| 28 | 1 | 24 | 14 | Minor |  | No findings | Alterations in T2 signal intensity in the white matter, particularly in the temporal and parietal regions. Septation/adhesion in the right ventricle and a left frontal ependymal cyst are noted. | No | Normal | |
| 29 | 1 | 23 | 17 | Minor |  | No findings | Mild T2 hyperintensity in the frontoparietal white matter. | No | Normal | |
| 30 | 2 | 24 | 13 | Minor |  | No findings | No findings | No | Normal | |
| 31 | ND | 23 | 15 | Minor |  | No findings | Subcortical cystic lesions and increased T2 signal intensity in the cerebral white matter. | No | Normal | |
| 32 | 2 | 33 | 5 | Minor |  | No findings | Slight increase in T2 signal intensity in certain areas of the white matter | No | Normal | |
| 33 | 1 | 23 | 15 | Minor |  | No findings | Small subcortical cyst in the right temporal lobe | No | Normal | |
| 34 | 2 | 30 | 8 | Minor |  | Bilateral ventriculomegaly (11m) | Possible frontal calcification and germinolytic cysts. | No | Normal | |
